# Supplementary material
Source: publisher figshare collection journal article supplement (https://tandf.figshare.com/ndownloader/files/12714008)
Supplement: Supplementary file 1 [file 12714008]

## Supplementary Materials

**Appendix Table 1: State-level availability and use of NREGS**

|               | FY 2006-2007                         |                                           |                     |                       |                                           | FY 2007-2008                         |                                           |                     |                       |                                           |
|---------------|--------------------------------------|-------------------------------------------|---------------------|-----------------------|-------------------------------------------|--------------------------------------|-------------------------------------------|---------------------|-----------------------|-------------------------------------------|
|               | Households<br>Demanded<br>Employment | %<br>Households<br>Provided<br>Employment | Total<br>Persondays | % Women<br>Persondays | Average<br>Persondays<br>per<br>Household | Households<br>Demanded<br>Employment | %<br>Households<br>Provided<br>Employment | Total<br>Persondays | % Women<br>Persondays | Average<br>Persondays<br>per<br>Household |
| State         |                                      |                                           |                     |                       |                                           |                                      |                                           |                     |                       |                                           |
| ASSAM         | 798,179                              | 99.3                                      | 57,292,000          | 31.7                  | 72.3                                      | 1,448,243                            | 96.9                                      | 48,761,000          | 30.9                  | 34.8                                      |
| KARNATAKA     | 548,532                              | 99.4                                      | 22,201,000          | 50.6                  | 40.7                                      | 554,002                              | 99.3                                      | 19,778,000          | 50.3                  | 36.0                                      |
| MAHARASHTRA   | 384,944                              | 100.0                                     | 15,928,000          | 37.1                  | 41.4                                      | 474,695                              | 100.0                                     | 18,486,000          | 40.0                  | 38.9                                      |
| RAJASTHAN     | 1,175,172                            | 100.0                                     | 99,887,000          | 67.1                  | 85.0                                      | 2,173,122                            | 99.9                                      | 167,838,000         | 69.0                  | 77.3                                      |
| UTTAR PRADESH | 2,678,700                            | 96.1                                      | 82,291,000          | 16.6                  | 32.0                                      | 4,104,283                            | 99.8                                      | 136,306,000         | 14.5                  | 33.3                                      |
| WEST BENGAL   | 3,242,594                            | 95.1                                      | 44,008,000          | 18.3                  | 14.3                                      | 3,919,996                            | 98.0                                      | 96,880,000          | 17.0                  | 25.2                                      |

Source:

[1] The NREGA fiscal year (FY) ends in March.

[2] Source: DMU reports, <http://mnregaweb4.nic.in>

**Appendix Table 2: Descriptive statistics for 2007**

|                                     | Urban          |                 |         | Rural          |                 |         | DiD ([5]-[4])-(2)-[1]) |         |
|-------------------------------------|----------------|-----------------|---------|----------------|-----------------|---------|------------------------|---------|
|                                     | Late districts | Early districts | p-value | Late districts | Early districts | P-value | Difference             | P-value |
|                                     | [1]            | [2]             | [3]     | [4]            | [5]             | [6]     | [7]                    | [8]     |
| Female                              | 0.66           | 0.66            | 0.964   | 0.64           | 0.63            | 0.594   | -0.010                 | 0.793   |
| Regression Controls                 |                |                 |         |                |                 |         |                        |         |
| Age 18 to 30                        | 0.06           | 0.07            | 0.836   | 0.06           | 0.07            | 0.325   | 0.000                  | 0.819   |
| Age 30 to 40                        | 0.3            | 0.2             | 0.015   | 0.19           | 0.22            | 0.140   | 0.130                  | 0.004   |
| Age 40 to 50                        | 0.16           | 0.21            | 0.147   | 0.2            | 0.21            | 0.434   | -0.040                 | 0.334   |
| Age above 50                        | 0.48           | 0.52            | 0.416   | 0.54           | 0.5             | 0.019   | -0.080                 | 0.086   |
| No education                        | 0.28           | 0.31            | 0.489   | 0.5            | 0.57            | 0.001   | 0.040                  | 0.444   |
| Less than 4 years of education      | 0.1            | 0.08            | 0.260   | 0.1            | 0.11            | 0.746   | 0.030                  | 0.281   |
| Years of education between 5 and 8  | 0.26           | 0.23            | 0.516   | 0.16           | 0.16            | 0.884   | 0.030                  | 0.463   |
| Years of education between 8 and 12 | 0.02           | 0.03            | 0.351   | 0.01           | 0.01            | 0.610   | -0.010                 | 0.323   |
| Years of education equal to 12      | 0.34           | 0.35            | 0.786   | 0.23           | 0.16            | 0.000   | -0.080                 | 0.027   |
| Widowed                             | 0.06           | 0.07            | 0.422   | 0.06           | 0.06            | 0.699   | -0.010                 | 0.553   |
| Currently married                   | 0.94           | 0.92            | 0.441   | 0.93           | 0.93            | 0.846   | 0.020                  | 0.532   |
| Single                              | 0.01           | 0.01            | 0.991   | 0.01           | 0.01            | 0.648   | 0.000                  | 0.852   |
| Household owns a phone              | 0.52           | 0.56            | 0.421   | 0.4            | 0.28            | 0.000   | -0.160                 | 0.001   |
| Household owns a bike/moped         | 0.61           | 0.74            | 0.001   | 0.7            | 0.63            | 0.000   | -0.200                 | <0.001  |
| Household size                      | 5.57           | 5.57            | 0.998   | 6.04           | 6.01            | 0.800   | -0.030                 | 0.913   |
| Household has a member over 65      | 0.15           | 0.15            | 0.917   | 0.13           | 0.15            | 0.204   | 0.020                  | 0.669   |
| Household has a member under 5      | 0.18           | 0.15            | 0.469   | 0.18           | 0.22            | 0.010   | 0.070                  | 0.093   |
| Mental Health Outcomes              |                |                 |         |                |                 |         |                        |         |
| Depression ICD-10 diagnosis         | 0.08           | 0.15            | 0.013   | 0.13           | 0.14            | 0.765   | -0.060                 | 0.038   |
| Sad                                 | 0.13           | 0.26            | 0.001   | 0.2            | 0.22            | 0.165   | -0.110                 | 0.011   |
| Lost interest                       | 0.14           | 0.26            | 0.003   | 0.22           | 0.24            | 0.482   | -0.100                 | 0.017   |
| Lack energy                         | 0.2            | 0.28            | 0.033   | 0.29           | 0.3             | 0.778   | -0.070                 | 0.080   |
| Cannot cope                         | 0.27           | 0.22            | 0.249   | 0.2            | 0.25            | 0.004   | 0.100                  | 0.025   |
| Cannot control                      | 0.28           | 0.19            | 0.018   | 0.19           | 0.22            | 0.065   | 0.120                  | 0.003   |
| Hopeless                            | 0.04           | 0.11            | 0.004   | 0.06           | 0.08            | 0.148   | -0.050                 | 0.029   |
| Suicidal                            | 0.02           | 0.07            | 0.008   | 0.06           | 0.05            | 0.261   | -0.060                 | 0.004   |
| Low self-esteem                     | 0.02           | 0.1             | 0.001   | 0.07           | 0.08            | 0.162   | -0.070                 | 0.017   |
| Anxious                             | 0.07           | 0.14            | 0.021   | 0.12           | 0.12            | 0.719   | -0.070                 | 0.056   |
| Mechanisms                          |                |                 |         |                |                 |         |                        |         |
| Currently work                      | 0.43           | 0.44            | 0.678   | 0.47           | 0.55            | 0.000   | 0.070                  | 0.192   |
| Hours worked per day                | 2.78           | 3.44            | 0.070   | 3.28           | 3.79            | 0.001   | -0.150                 | 0.706   |

|                              |        |        |       |        |        |       |        |       |
|------------------------------|--------|--------|-------|--------|--------|-------|--------|-------|
| Days worked per week         | 2.65   | 2.78   | 0.654 | 2.87   | 3.38   | 0.000 | 0.380  | 0.238 |
| Total per capita expenditure | 719.91 | 654.8  | 0.116 | 578.71 | 504.78 | 0.000 | -8.820 | 0.810 |
| Food per capita expenditure  | 142.14 | 120.55 | 0.001 | 125.21 | 106.04 | 0.000 | 2.420  | 0.702 |
| Underweight                  | 0.27   | 0.2    | 0.055 | 0.35   | 0.39   | 0.083 | 0.110  | 0.024 |
| WHO Disabilitiy Index        | 16.83  | 15.47  | 0.301 | 17.18  | 18.36  | 0.065 | 2.540  | 0.095 |
| Social Index                 | 0.84   | 0.96   | 0.353 | 1.21   | 1.07   | 0.009 | -0.260 | 0.050 |
| Number of Observations       | 181    | 367    |       | 752    | 2605   |       |        |       |

Notes:

[1] Raw sample means for analysis sample for 2007.

[2] Source: Study on global AGEing and adult health (SAGE),  
<http://www.who.int/healthinfo/sage/en/>.

**Appendix Table 3: District Characteristics**

|                                                            | Late | Early | P-value |
|------------------------------------------------------------|------|-------|---------|
| <i>Indices from Indian Planning Commission Report 2003</i> |      |       |         |
| Index for Percentage SC (1991 Census)                      | 0.85 | 0.74  | 0.000   |
| Index for Agricultural wages (1996/1997)                   | 0.31 | 0.19  | 0.000   |
| Index for output per agricultural worker (1990/1993)       | 0.12 | 0.07  | 0.000   |
| <i>Current Characteristics from NSS - 61st round</i>       |      |       |         |
| Rural ST fraction                                          | 0.03 | 0.11  | 0.009   |
| Rural SC fraction                                          | 0.18 | 0.23  | 0.087   |
| Rural Proportion Illiterate                                | 0.4  | 0.48  | 0.005   |
| Rural Female employment rate                               | 0.23 | 0.28  | 0.146   |
| Rural Male employment rate                                 | 0.61 | 0.6   | 0.347   |
| Rural Proportion under poverty line                        | 0.18 | 0.22  | 0.171   |
| NBA proportion                                             | 14.3 | 13.21 | 0.727   |
| Number of districts                                        | 30   | 81    |         |

Sources: Data on district indices are from Planning Commission Report of the Task Force - Identification of districts for wage and self-employment programmes.; Data from National Sample Survey 2004-2005 (61st round) are from Schedule 10 - Employment and Unemployment, <http://catalog.ihsn.org/index.php/catalog/2316/study-description> ; Data on the sanitation campaign known as Nirmal Bharat Abhiyan (NBA) are available at: <https://data.gov.in/catalog/nirmal-bharat-abhiyan-year-wise-district-level-achievements> and [tsc.gov.in/tsc/NDSAP/StatewiseDistrictwisePhysicalProgress.xml](https://tsc.gov.in/tsc/NDSAP/StatewiseDistrictwisePhysicalProgress.xml) .

**Appendix Table 4: Pre-program tests using World Health Survey from 2003**

|                         | Sad                | Lost interest in things | Lack Energy         | Cannot cope        | Cannot control     | Total per capita expenditures | Food per capita expenditures | Currently working  | Underweight        |
|-------------------------|--------------------|-------------------------|---------------------|--------------------|--------------------|-------------------------------|------------------------------|--------------------|--------------------|
|                         | [2]                | [3]                     | [4]                 | [5]                | [6]                | [7]                           | [8]                          | [9]                | [10]               |
| <i>Panel A: Females</i> |                    |                         |                     |                    |                    |                               |                              |                    |                    |
| Rural*Early Treatment   | 0.083<br>(0.0647)  | 0.087<br>(0.0678)       | -0.03<br>(0.0665)   | 0.062<br>(0.0672)  | 0.004<br>(0.0484)  | 187.572<br>(220.9370)         | -38.199<br>(36.0697)         | 0.033<br>(0.0714)  | 0.039<br>(0.0604)  |
| Early Treatment         | -0.028<br>(0.0863) | -0.068<br>(0.0856)      | -0.04<br>(0.0798)   | -0.087<br>(0.0836) | -0.014<br>(0.0674) | -155.825<br>(234.5317)        | 25.733<br>(40.1697)          | -0.026<br>(0.0955) | -0.045<br>(0.0686) |
| Rural                   | -0.033<br>(0.0511) | -0.065<br>(0.0579)      | 0.05<br>(0.0518)    | -0.047<br>(0.0606) | -0.014<br>(0.0377) | -171.024<br>(190.4220)        | -10.403<br>(27.0229)         | 0.042<br>(0.0596)  | 0.044<br>(0.0489)  |
| Number of observations  | 2211               | 2211                    | 2211                | 2211               | 2211               | 2043                          | 2197                         | 2179               | 2078               |
| <i>Panel B: Males</i>   |                    |                         |                     |                    |                    |                               |                              |                    |                    |
| Rural*Early Treatment   | 0.052<br>(0.0746)  | 0.041<br>(0.0663)       | 0.123*<br>(0.0644)  | 0.061<br>(0.0730)  | -0.069<br>(0.0542) | 45.733<br>(80.7680)           | 57.954<br>(86.8413)          | -0.045<br>(0.0448) | 0.065<br>(0.0757)  |
| Early Treatment         | 0.053<br>(0.0926)  | 0.016<br>(0.0818)       | -0.02<br>(0.0732)   | -0.019<br>(0.0954) | 0.034<br>(0.0660)  | 11.929<br>(89.0369)           | -91.672<br>(97.1825)         | 0.057<br>(0.0439)  | -0.116<br>(0.0866) |
| Rural                   | -0.02<br>(0.0608)  | -0.007<br>(0.0523)      | -0.096*<br>(0.0512) | -0.086<br>(0.0641) | 0.038<br>(0.0318)  | -177.065***<br>(67.0283)      | -144.333*<br>(81.1923)       | 0.034<br>(0.0365)  | -0.021<br>(0.0626) |
| Number of observations  | 1850               | 1850                    | 1850                | 1850               | 1850               | 1695                          | 1840                         | 1830               | 1766               |

Notes:

[1] Regressions include controls for district characteristics (the three indices from the Indian Planning Commission, fraction ST and SC, fraction illiterate, female and male employment rates, and fraction under poverty line for rural areas of the district, and measure of bureaucratic efficiency based on the performance of the NBA program); individual characteristics (dummies for age 30 to 40, 40 to 50, and greater than 50, dummies for years of education under 4, between 5 and 8, between 8 and 12, and 12, as well as marital status, household asset ownership, household size, presence of a child under 5 in the household, presence of an elderly person above 65 in the household), state fixed effects and interview month fixed effects.

[2] Standard errors in parentheses, clustered at the district level. Number of districts=111.

[3] \* denotes significance at the 10% level, \*\* denotes significance at the 5% level, and \*\*\* denotes significance at the 1% level.

**Appendix Table 5: Effect of NREGS on Mental Health Among Treated Districts Only by Intensity of Treatment**

|                                | Depression ICD-10 diagnosis | Sad                  | Lost interest in things | Lack Energy         | Cannot cope        | Cannot control       | Hopeless              | Suicidal              | Low Self-esteem       | Anxious               |
|--------------------------------|-----------------------------|----------------------|-------------------------|---------------------|--------------------|----------------------|-----------------------|-----------------------|-----------------------|-----------------------|
|                                | [1]                         | [2]                  | [3]                     | [4]                 | [5]                | [6]                  | [7]                   | [8]                   | [9]                   | [10]                  |
| <i>Panel A: Females</i>        |                             |                      |                         |                     |                    |                      |                       |                       |                       |                       |
| Rural*High Intensity Treatment | -0.211***<br>(0.0645)       | -0.116<br>(0.0775)   | -0.255***<br>(0.0804)   | -0.076<br>(0.0772)  | -0.04<br>(0.0623)  | 0.012<br>(0.0794)    | -0.132***<br>(0.0495) | -0.137***<br>(0.0326) | -0.193***<br>(0.0532) | -0.172***<br>(0.0563) |
| High Intensity Treatment Rural | 0.121*<br>(0.0722)          | -0.001<br>(0.0887)   | 0.114<br>(0.0782)       | -0.064<br>(0.0810)  | 0.111<br>(0.0681)  | 0.082<br>(0.0783)    | 0.025<br>(0.0508)     | 0.027<br>(0.0382)     | 0.091<br>(0.0633)     | 0.059<br>(0.0661)     |
|                                | -0.007<br>(0.0357)          | -0.002<br>(0.0380)   | -0.045<br>(0.0458)      | 0<br>(0.0425)       | -0.041<br>(0.0403) | -0.03<br>(0.0459)    | -0.027<br>(0.0318)    | -0.033<br>(0.0222)    | -0.016<br>(0.0283)    | -0.002<br>(0.0330)    |
| Number of observations         | 1877                        | 1877                 | 1877                    | 1877                | 1877               | 1877                 | 1877                  | 1877                  | 1877                  | 1877                  |
| <i>Panel B: Males</i>          |                             |                      |                         |                     |                    |                      |                       |                       |                       |                       |
| Rural*High Intensity Treatment | -0.107<br>(0.0698)          | -0.208**<br>(0.0995) | -0.085<br>(0.1093)      | 0.057<br>(0.1151)   | -0.072<br>(0.0813) | -0.146*<br>(0.0789)  | 0.036<br>(0.0534)     | -0.066**<br>(0.0332)  | 0.086*<br>(0.0482)    | 0.042<br>(0.0644)     |
| High Intensity Treatment Rural | -0.013<br>(0.0933)          | 0.116<br>(0.1256)    | -0.04<br>(0.1283)       | -0.237*<br>(0.1284) | -0.011<br>(0.0799) | 0.236***<br>(0.0752) | -0.110*<br>(0.0580)   | -0.001<br>(0.0369)    | -0.176***<br>(0.0586) | -0.108<br>(0.0783)    |
|                                | 0.014<br>(0.0391)           | -0.051<br>(0.0630)   | -0.034<br>(0.0743)      | -0.07<br>(0.0585)   | -0.05<br>(0.0429)  | 0.021<br>(0.0322)    | -0.005<br>(0.0365)    | 0.002<br>(0.0263)     | 0.01<br>(0.0319)      | 0.003<br>(0.0394)     |
| Number of observations         | 1095                        | 1095                 | 1095                    | 1095                | 1095               | 1095                 | 1095                  | 1095                  | 1095                  | 1095                  |

Notes:

[1] Regressions include controls for district characteristics (the three indices from the Indian Planning Commission, fraction ST and SC, fraction illiterate, female and male employment rates, and fraction under poverty line for the rural areas of the district, and measure of bureaucratic efficiency based on the performance of the NBA program); individual characteristics (dummies for age 30 to 40, 40 to 50, and greater than 50, dummies for years of education under 4, between 5 and 8, between 8 and 12, and 12, as well as marital status, household asset ownership, household size, presence of a child under 5 in the household, presence of an elderly person above 65 in the household), state fixed effects and interview month fixed effects.

[2] High intensity treatment is defined as a district where NREGS recipients worked on average 50 days or more (out of a maximum of 100). Out of the 81 districts that should have received the program in Phase 1 or Phase 2, there are 16 high intensity treatment districts, all of which received the program in Phase 1.

[3] Standard errors in parentheses, clustered at the district level. Number of districts=81.

[4] \* denotes significance at the 10% level, \*\* denotes significance at the 5% level, and \*\*\* denotes significance at the 1% level.

**Appendix Table 6: Heterogeneity in the Effect of NREGS on Mental Health by Household Poverty**

|                                                            | Depression<br>ICD-10<br>diagnosis | Sad                  | Lost<br>interest in<br>things | Lack<br>Energy      | Cannot<br>cope        | Cannot<br>control     | Hopeless             | Suicidal              | Low Self-<br>esteem   | Anxious               |
|------------------------------------------------------------|-----------------------------------|----------------------|-------------------------------|---------------------|-----------------------|-----------------------|----------------------|-----------------------|-----------------------|-----------------------|
|                                                            | [1]                               | [2]                  | [3]                           | [4]                 | [5]                   | [6]                   | [7]                  | [8]                   | [9]                   | [10]                  |
| <i>Panel A: Females</i>                                    |                                   |                      |                               |                     |                       |                       |                      |                       |                       |                       |
| Rural*Early Treatment                                      | -0.187**<br>(0.0835)              | -0.266**<br>(0.1031) | -0.243***<br>(0.0838)         | -0.136*<br>(0.0727) | -0.083<br>(0.0964)    | -0.104<br>(0.1223)    | -0.169**<br>(0.0659) | -0.222***<br>(0.0613) | -0.152***<br>(0.0537) | -0.195**<br>(0.0758)  |
| Rural*Early Treatment*Permanent<br>Income                  | 0.140*<br>(0.0723)                | 0.162*<br>(0.0886)   | 0.069<br>(0.0877)             | 0.024<br>(0.0737)   | 0.085<br>(0.0761)     | 0.129<br>(0.0901)     | 0.115*<br>(0.0613)   | 0.155***<br>(0.0563)  | 0.100*<br>(0.0538)    | 0.154**<br>(0.0676)   |
| Early Treatment*Permanent Income<br>Rural*Permanent Income | -0.106*<br>(0.0621)               | -0.137*<br>(0.0764)  | -0.089<br>(0.0826)            | -0.043<br>(0.0584)  | -0.095<br>(0.0619)    | -0.089<br>(0.0821)    | -0.109**<br>(0.0522) | -0.104**<br>(0.0459)  | -0.076*<br>(0.0441)   | -0.115*<br>(0.0592)   |
|                                                            | -0.071**<br>(0.0317)              | -0.091**<br>(0.0418) | -0.033<br>(0.0439)            | -0.037<br>(0.0493)  | -0.141***<br>(0.0430) | -0.150***<br>(0.0426) | -0.036<br>(0.0309)   | -0.082**<br>(0.0319)  | -0.046<br>(0.0310)    | -0.086***<br>(0.0290) |
| Early Treatment                                            | 0.121<br>(0.0747)                 | 0.234**<br>(0.0912)  | 0.236***<br>(0.0807)          | 0.119*<br>(0.0626)  | 0.031<br>(0.0901)     | -0.023<br>(0.1270)    | 0.143**<br>(0.0586)  | 0.142***<br>(0.0541)  | 0.113**<br>(0.0472)   | 0.132*<br>(0.0675)    |
| Rural                                                      | 0.104**<br>(0.0467)               | 0.191**<br>(0.0771)  | 0.142**<br>(0.0635)           | 0.128**<br>(0.0538) | 0.096<br>(0.0769)     | 0.099<br>(0.0830)     | 0.066*<br>(0.0379)   | 0.119***<br>(0.0353)  | 0.075**<br>(0.0363)   | 0.120***<br>(0.0455)  |
| Number of observations                                     | 2476                              | 2476                 | 2476                          | 2476                | 2476                  | 2476                  | 2476                 | 2476                  | 2476                  | 2476                  |
| <i>Panel B: Males</i>                                      |                                   |                      |                               |                     |                       |                       |                      |                       |                       |                       |
| Rural*Early Treatment                                      | -0.134<br>(0.1071)                | -0.075<br>(0.1154)   | -0.089<br>(0.1389)            | -0.157<br>(0.1416)  | -0.032<br>(0.1308)    | 0.136<br>(0.0927)     | -0.075<br>(0.0926)   | -0.083<br>(0.0842)    | -0.132<br>(0.0877)    | -0.127<br>(0.1048)    |
| Rural*Early Treatment*Permanent<br>Income                  | 0.175*<br>(0.1035)                | 0.01<br>(0.1232)     | 0.125<br>(0.1249)             | 0.166<br>(0.1350)   | 0.043<br>(0.1268)     | -0.021<br>(0.0888)    | 0.106<br>(0.0791)    | 0.1<br>(0.0799)       | 0.164**<br>(0.0738)   | 0.175*<br>(0.1030)    |
| Early Treatment*Permanent Income                           | -0.194**<br>(0.0920)              | -0.004<br>(0.0989)   | -0.131<br>(0.1005)            | -0.16<br>(0.1025)   | -0.194<br>(0.1176)    | -0.086<br>(0.0711)    | -0.114<br>(0.0747)   | -0.097<br>(0.0778)    | -0.155**<br>(0.0631)  | -0.209**<br>(0.0885)  |

|                        |                   |                    |                    |                    |                    |                       |                    |                    |                    |                    |
|------------------------|-------------------|--------------------|--------------------|--------------------|--------------------|-----------------------|--------------------|--------------------|--------------------|--------------------|
| Rural*Permanent Income | -0.03<br>(0.0553) | -0.079<br>(0.0594) | -0.033<br>(0.0659) | -0.023<br>(0.0730) | 0.018<br>(0.0604)  | 0.01<br>(0.0453)      | -0.027<br>(0.0361) | -0.035<br>(0.0335) | -0.062<br>(0.0436) | -0.034<br>(0.0548) |
| Early Treatment        | 0.118<br>(0.1038) | 0.045<br>(0.1178)  | 0.119<br>(0.1391)  | 0.172<br>(0.1308)  | 0.187<br>(0.1347)  | -0.027<br>(0.0921)    | 0.078<br>(0.0906)  | 0.079<br>(0.0824)  | 0.124<br>(0.0788)  | 0.146<br>(0.0995)  |
| Rural                  | 0.01<br>(0.0607)  | 0.044<br>(0.0591)  | -0.041<br>(0.0778) | -0.028<br>(0.0801) | -0.083<br>(0.0514) | -0.134***<br>(0.0497) | 0.005<br>(0.0451)  | 0.02<br>(0.0395)   | 0.059<br>(0.0588)  | 0.01<br>(0.0550)   |
| Number of observations | 1429              | 1429               | 1429               | 1429               | 1429               | 1429                  | 1429               | 1429               | 1429               | 1429               |

Notes:

[1] Regressions include controls for district characteristics (the three indices from the Indian Planning Commission, fraction ST and SC, fraction illiterate, female and male employment rates, and fraction under poverty line for the rural areas of the district, and measure of bureaucratic efficiency based on the performance of the NBA program); individual characteristics (dummies for age 30 to 40, 40 to 50, and greater than 50, dummies for years of education under 4, between 5 and 8, between 8 and 12, and 12, as well as marital status, household asset ownership, household size, presence of a child under 5 in the household, presence of an elderly person above 65 in the household), state fixed effects and interview month fixed effects.

[2] The permanent income measure, provided in the SAGE data, is a latent income index based on ownership of 21 assets (for more details, see Appendix 4 in Arokiasamy et al., 2013). In our sample, it has a mean of about 0.6 and a standard deviation of about 0.5.

[3] Standard errors in parentheses, clustered at the district level. Number of districts=111.

[4] \* denotes significance at the 10% level, \*\* denotes significance at the 5% level, and \*\*\* denotes significance at the 1% level.
